# Supplementary material for: First-principles study on the optoelectronic and mechanical properties of all-inorganic lead-free fluoride perovskites ABF3 (A = Na, K and B = Si, Ge)
Source: Royal Society of Chemistry journal article supplement (doi:10.1039/d3ma00457k), 2023-01-01
Supplement: d3ma00457k1.pdf [file d3ma00457k1.pdf]

## Electronic Supplementary Information (ESI) – First-principles study on the optoelectronic and mechanical properties of all-inorganic lead-free fluoride perovskites $ABF_3$ ( $A = Na, K$ and $B = Si, Ge$ )

Chol-Jin Pak, Un-Gi Jong\*, Chung-Jin Kang, Yun-Sim Kim, Yun-Hyok Kye, and Chol-Jun Yu†

*Chair of Computational Materials Design (CMD), Faculty of Materials Science, Kim Il Sung University,  
Pyongyang, PO Box 76, Democratic People's Republic of Korea*

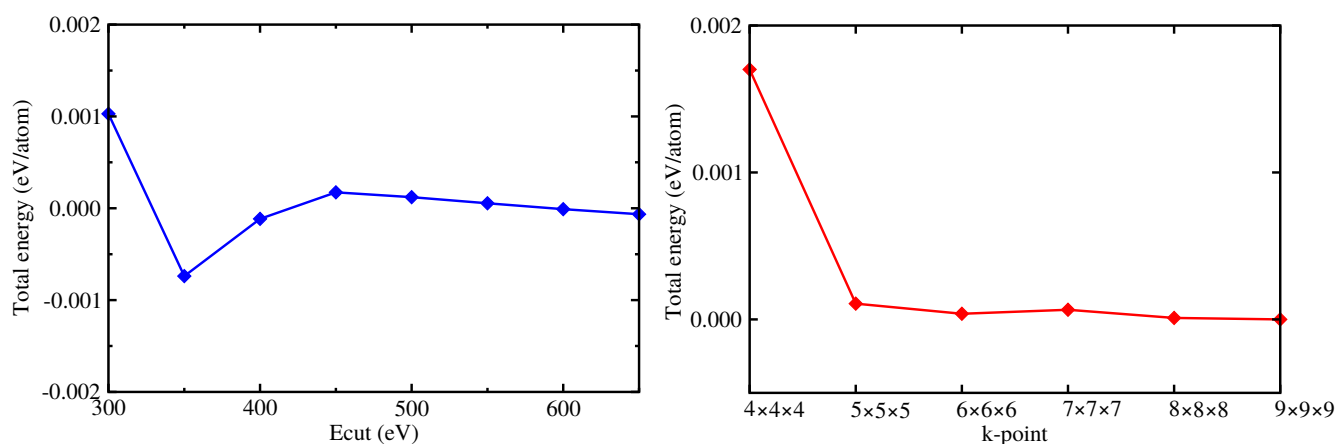

Figure S1 Convergence tests of total energy per atom for a unit cell containing 5 atoms according to the sizes of the energy cutoff and  $k$ -point mesh for the fluoride perovskite  $ABF_3$  ( $A = Na, K$  and  $B = Si, Ge$ ).

\*Un-Gi Jong, Email: ug.jong@ryongnamsan.edu.kp

†Chol-Jun Yu, Email: cj.yu@ryongnamsan.edu.kp

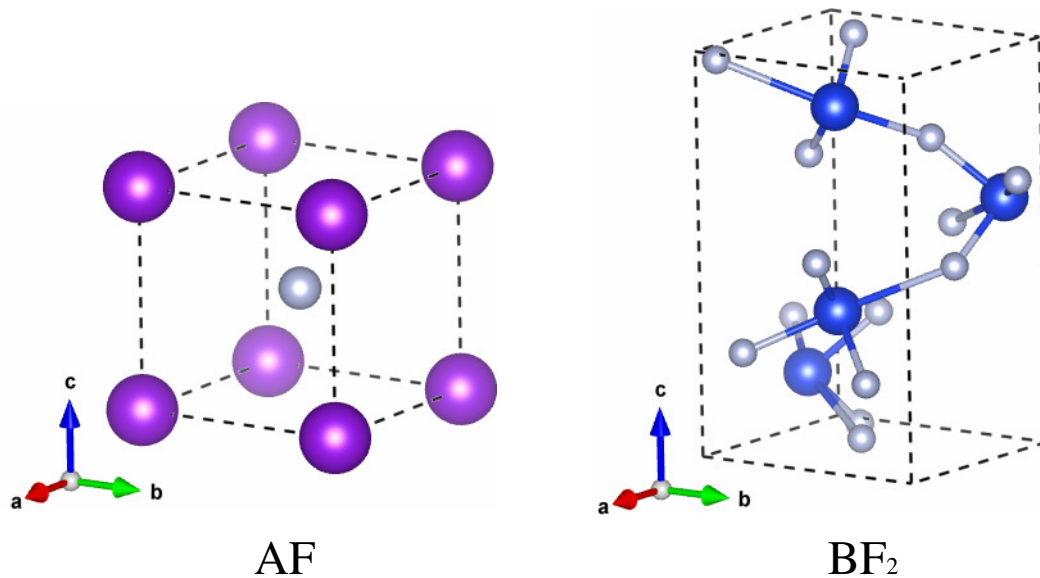

Figure S2 Crystalline structures of the cubic AB and orthorhombic BF<sub>2</sub> with the  $Pm\bar{3}m$  and  $P212121$  space group, respectively (A = Na, K and B = Si, Ge).

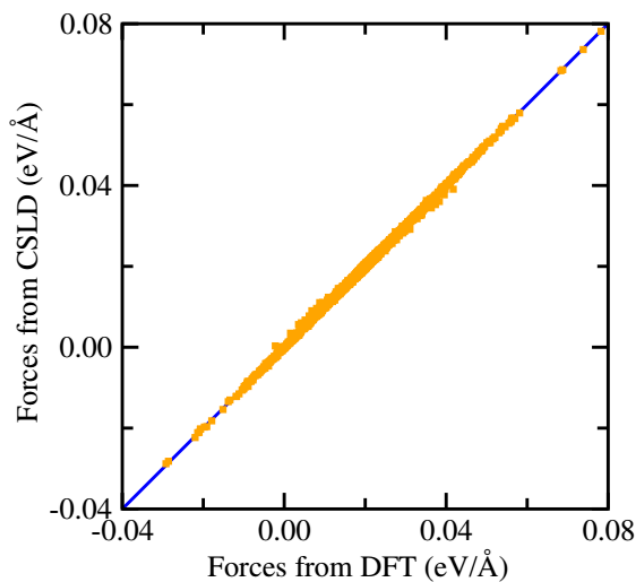

Figure S3. Comparison of the atomic forces obtained from DFT and IFCs for the fluoride perovskite KGeF<sub>3</sub>.

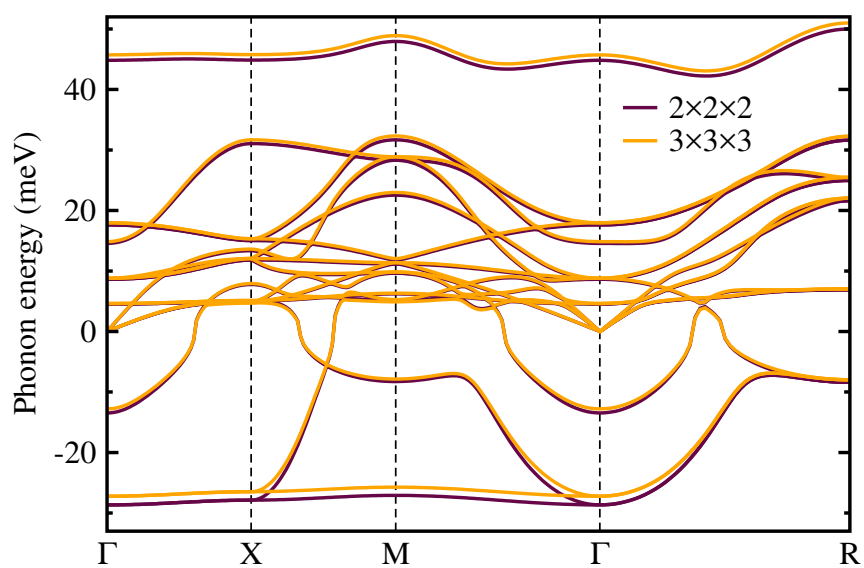

Figure S4. Comparison of the phonon dispersion curves calculated with  $2 \times 2 \times 2$  and  $3 \times 3 \times 3$  supercells for the fluoride perovskite  $\text{KGeF}_3$ .
